# Supplementary material for: Synergistic Effect of Sophora japonica and Glycyrrhiza glabra Flavonoid-Rich Fractions on Wound Healing: In Vivo and Molecular Docking Studies
Source: Molecules. 2023 Mar 27;28(7):2994. doi: 10.3390/molecules28072994 (PMC10096052; doi:10.3390/molecules28072994)
Supplement: Supplementary file 1 [file molecules-28-02994-s001.zip › molecules-2269229-supplementary.pdf]

# Synergistic effect of *Sophora japonica* and *Glycyrrhiza glabra* Flavonoid-Rich Fractions on Wound Healing: *In vivo* and Molecular Docking Studies

Shaza H. Aly <sup>1, \*</sup>, Ahmed M. Elissawy <sup>2,3</sup>, Abdallah Mahmoud <sup>4</sup>, Fatma Sa'eed El-Tokhy <sup>5</sup>, Sherif S. Abdel Mageed <sup>4</sup>, Mahmoud A. El Hassab <sup>6</sup>, Wagdy M. Eldehna <sup>7,8</sup>, Hadia Almahli <sup>9</sup>, Sara T. Al-Rashood <sup>10</sup>, Faizah A. Binjubair <sup>10</sup> and Abd El-Nasser B. Singab <sup>2,3,\*</sup>

<sup>1</sup> Department of Pharmacognosy, Faculty of Pharmacy, Badr University in Cairo (BUC), Badr City, Cairo 11829, Egypt

<sup>2</sup> Department of Pharmacognosy, Faculty of Pharmacy, Ain-Shams University, 11566, Cairo, Egypt

<sup>3</sup> Center of Drug Discovery Research and Development, Ain Shams University, Cairo, Egypt

<sup>4</sup> Pharmacology and Toxicology Department, Faculty of Pharmacy, Badr University in Cairo (BUC), Badr city, Cairo, 11829, Egypt

<sup>5</sup> Department of Pharmaceutics and pharmaceutical technology, Badr University in Cairo (BUC), Badr city, Cairo, 11829, Egypt

<sup>6</sup> Department of Medicinal Chemistry, Faculty of Pharmacy, King Salman International University (KSIU),

South Sinai 46612, Egypt

<sup>7</sup> Department of Pharmaceutical Chemistry, Faculty of Pharmacy, Kafrelsheikh University, Kafrelsheikh 33516, Egypt

<sup>8</sup> School of Biotechnology, Badr University in Cairo, Badr City, Cairo 11829, Egypt

<sup>9</sup> Department of Chemistry, University of Cambridge, Cambridge CB2 1EW, UK

<sup>10</sup> Department of Pharmaceutical Chemistry, College of Pharmacy, King Saud University, P.O. Box 2457, Riyadh 11451, Saudi Arabia

\* Correspondence: (A.N.B.S.) dean@pharma.asu.edu.eg, (S.H.A.) shaza.husseiny@buc.edu.eg

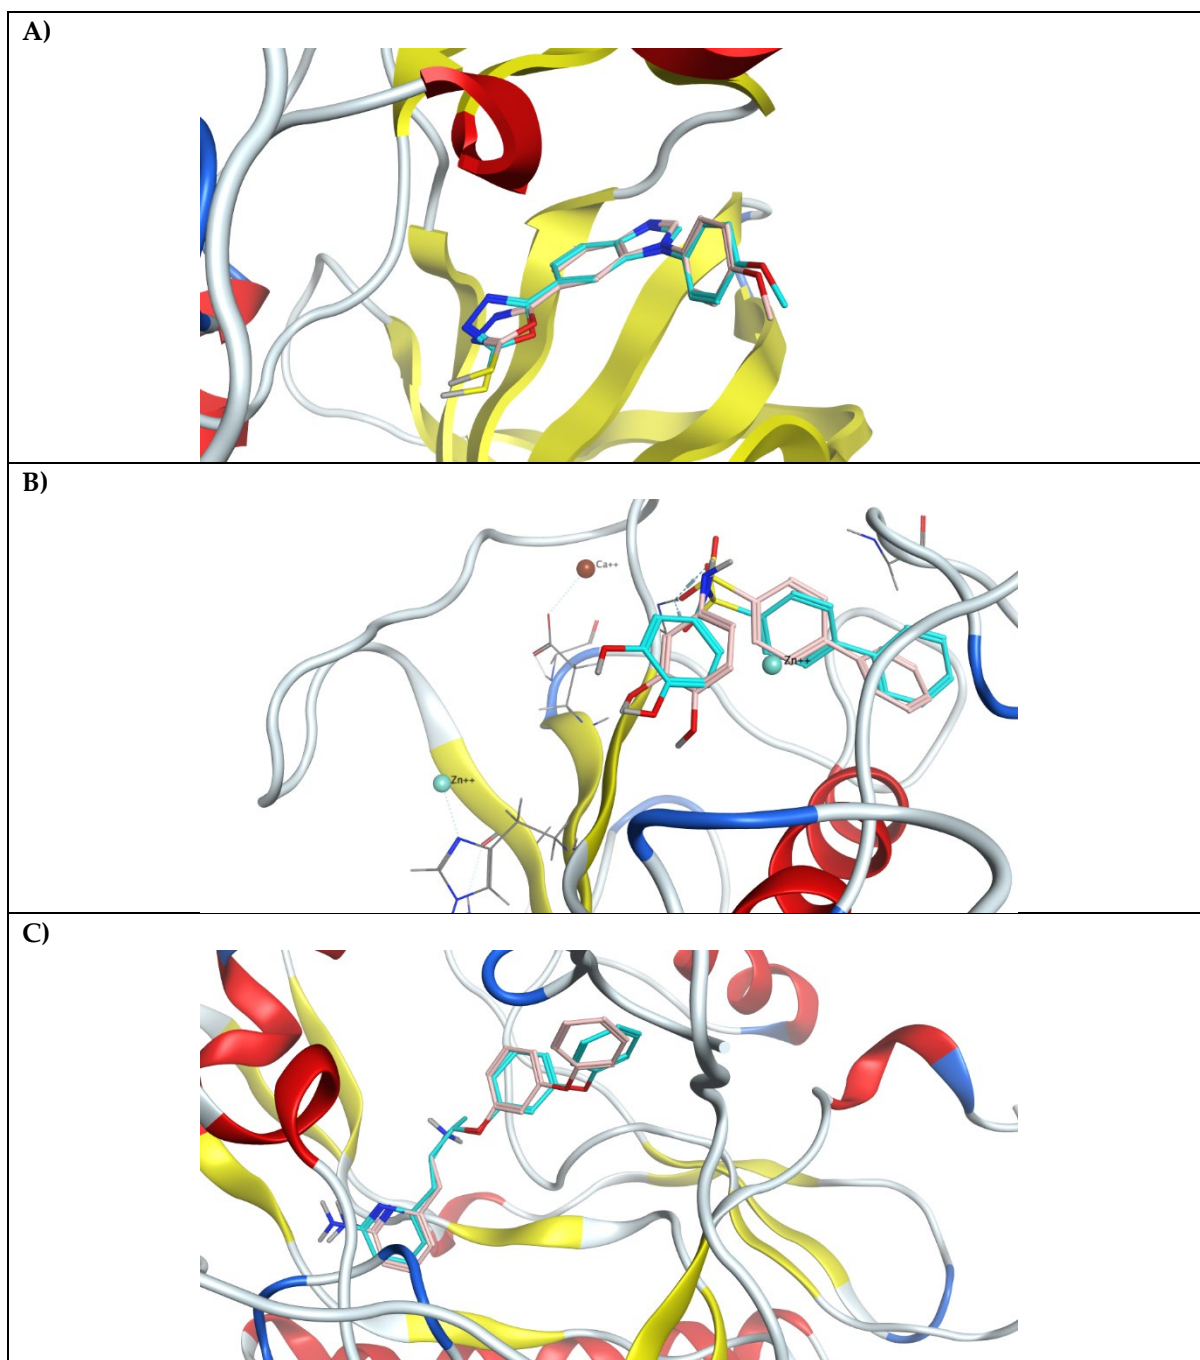

**Figure S1.** Docking validation of the three targets **A)** GSK3-  $\beta$  (PDB ID: 3F88), **B)** MMP-8 (PDB ID: 5H8X) and **C)** iNOS (PDB ID: 3N2R).

A)

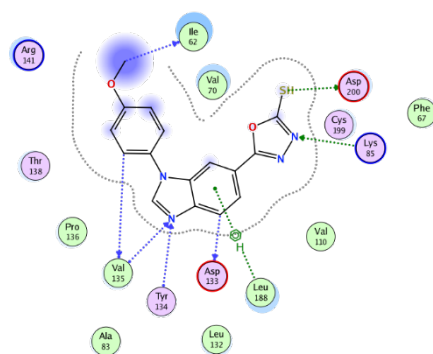

B)

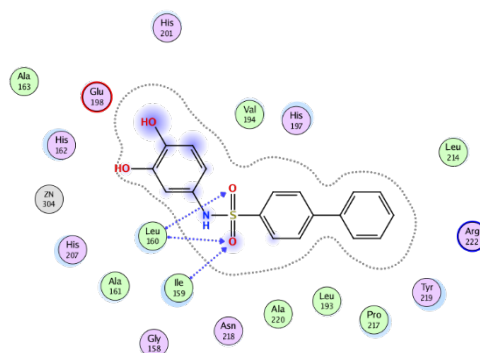

C)

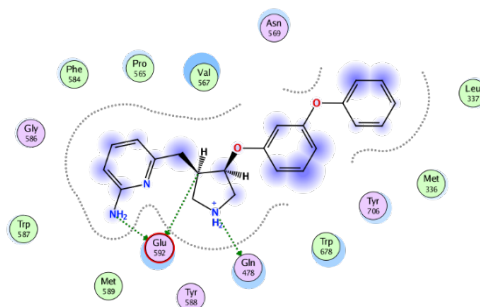

**Figure S2.** Interaction of the three co-crystallized ligands with **A)** GSK3- $\beta$  (PDB ID: 3F88), **B)** MMP-8 (PDB ID: 5H8X) and **C)** iNOS (PDB ID: 3N2R).
